# Supplementary material for: Zinc-doped nickel oxide dendritic crystals with fast response and self-recovery for ammonia detection at room temperature
Source: Royal Society of Chemistry journal article supplement (doi:10.1039/c2jm34192a), 2012-01-01
Supplement: c2jm34192a.pdf [file c2jm34192a.pdf]

## Supporting Information

### Zinc-doped nickel oxide dendritic crystals with fast response and self-recovery for ammonia detection at room temperature

Jian Wang, Liangming Wei, Liying Zhang, Jing Zhang, Hao Wei, Chuanhai Jiang and Yafei Zhang\*

*Key Laboratory for Thin Film and Microfabrication of the Ministry of Education, Research Institute of Micro / Nano Science and Technology, School of Materials Science and Engineering, Shanghai Jiao Tong University, Shanghai 200240, China.*

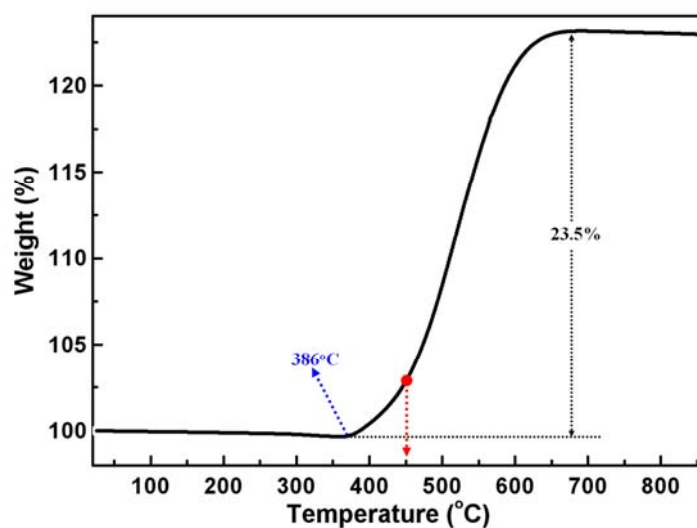

**Fig. S1** Thermogravimetric (TG) curve of Zn-doped NiO dendritic crystals (increasing temperature from 30 °C to 900 °C in air).

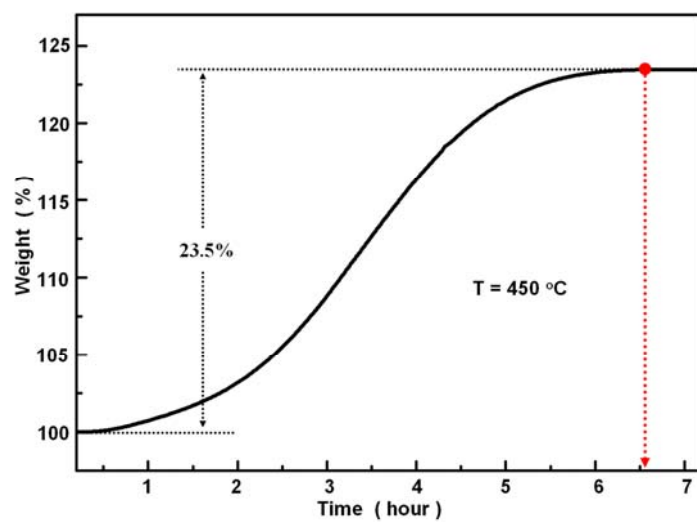

**Fig. S2** Thermogravimetric (TG) curve of Zn-doped NiO dendritic crystals (fixed the temperature at 450 °C, increasing time from 0 to 8 h in air).
